# Supplementary material for: Association Between Left Ventricular Mechanical Deformation and Myocardial Fibrosis in Nonischemic Cardiomyopathy
Source: PubMed Central journal article supplement — J Am Heart Assoc. 2020 Oct 2;9(19):e016797. doi: 10.1161/JAHA.120.016797 (PMC7792406; doi:10.1161/jaha.120.016797), 2020-10-02
Supplement: JAH3-9-e016797-s001.pdf [file JAH3-9-e016797-s001.pdf]

# **Supplemental Material**

**Table S1. Cardiac magnetic resonance left and right ventricular mechanical parameters in non-ischemic cardiomyopathy patients with and without septal fibrosis.**

| Variables                   | No septal LGE | Septal LGE   | P value |
|-----------------------------|---------------|--------------|---------|
|                             | N = 187       | N = 52       |         |
| LVEDVi (ml/m <sup>2</sup> ) | 130 ± 36      | 140 ± 35     | 0.236   |
| LVESVi (ml/m <sup>2</sup> ) | 88 ± 40       | 101 ± 40     | 0.046*  |
| LVSVi (ml/m <sup>2</sup> )  | 42 ± 12       | 39 ± 12      | 0.175   |
| LVEF (%)                    | 35 ± 14       | 30 ± 12      | 0.032*  |
| LVMi (g/m <sup>2</sup> )    | 71 ± 21       | 74 ± 18      | 0.317   |
| RVEDVi (ml/m <sup>2</sup> ) | 91 ± 25       | 89 ± 25      | 0.594   |
| RVESVi (ml/m <sup>2</sup> ) | 50 ± 28       | 52 ± 27      | 0.724   |
| RVSVi (ml/m <sup>2</sup> )  | 42 ± 11       | 37 ± 11      | 0.026*  |
| RVEF (%)                    | 46 ± 14       | 44 ± 15      | 0.436   |
| RVEF/LVEF                   | 1.4 ± 0.4     | 1.6 ± 0.5    | 0.023*  |
| RVEDV/LVEDV                 | 0.73 ± 0.20   | 0.66 ± 0.18  | 0.039*  |
| GCS (%)                     | -9.7 ± 4.4    | -7.9 ± 3.5   | 0.045*  |
| SSR <sub>C</sub> (1/s)      | -0.54 ± 0.22  | -0.44 ± 0.22 | 0.007*  |
| DSR <sub>C</sub> (1/s)      | 0.52 ± 0.26   | 0.41 ± 0.18  | 0.042*  |
| GLS (%)                     | -8.9 ± 4.2    | -8.0 ± 3.5   | 0.161   |
| SSR <sub>L</sub> (1/s)      | -5.00 ± 0.21  | -0.45 ± 0.21 | 0.143   |
| DSR <sub>L</sub> (1/s)      | 0.48 ± 0.19   | 0.44 ± 0.18  | 0.178   |
| GRS (%)                     | 13.3 ± 7.7    | 10.7 ± 5.2   | 0.023*  |
| SSR <sub>R</sub> (1/s)      | 0.71 ± 0.35   | 0.59 ± 0.29  | 0.022*  |
| DSR <sub>R</sub> (1/s)      | -0.69 ± 0.46  | -0.55 ± 0.28 | 0.045*  |

### Basal systolic rotation

|                   |            |            |       |
|-------------------|------------|------------|-------|
| Net Clockwise (°) | -1.5 ± 1.1 | -1.4 ± 1.1 | 0.653 |
| Magnitude (°)     | -1.3 ± 1.5 | -1.2 ± 1.5 | 0.682 |

### Apical systolic rotation

|                             |             |             |       |
|-----------------------------|-------------|-------------|-------|
| Net Counterclockwise (°)    | 2.1 ± 1.8   | 1.9 ± 1.7   | 0.756 |
| Magnitude (°)               | 1.4 ± 2.8   | 1.1 ± 2.8   | 0.593 |
| Twist (°)                   | 2.7 ± 2.6   | 2.3 ± 2.7   | 0.423 |
| Twist per length (°/cm)     | 0.39 ± 0.39 | 0.35 ± 0.43 | 0.504 |
| Torsion (°s <sup>-1</sup> ) | 1.23 ± 1.08 | 1.19 ± 1.21 | 0.856 |

---

DSR<sub>C</sub>= circumferential diastolic strain rate; DSR<sub>L</sub>= longitudinal diastolic strain rate; DSR<sub>R</sub>= radial diastolic strain rate; GCS= global circumferential strain; GLS= global longitudinal strain; GRS= global radial strain; LGE= late-gadolinium enhancement; LVEDVi= left ventricular end-diastolic volume index; LVESVi= left ventricular end-systolic volume index; LVEF=left ventricular ejection fraction; LVMi= left ventricular mass index; LVSVi= left ventricular stroke volume index; RVEDV= right ventricular end-diastolic volume; RVEDVi= right ventricular end-diastolic volume index; RVESVi= left ventricular end-systolic volume index; RVEF= right ventricular ejection fraction; RVSVi= right ventricular stroke volume index; SSR<sub>C</sub>= circumferential systolic strain rate; SSR<sub>L</sub>= longitudinal systolic strain rate; SSR<sub>R</sub>= radial systolic strain rate; \*Significant value (P < 0.05)

**Table S2. Cardiac magnetic resonance left ventricular mechanical parameters in non-ischemic cardiomyopathy patients with and without free wall fibrosis.**

| Variables                   | No free wall LGE | Free wall LGE | P value |
|-----------------------------|------------------|---------------|---------|
|                             | N = 191          | N = 48        |         |
| LVEDVi (ml/m <sup>2</sup> ) | 133 ± 35         | 128 ± 39      | 0.397   |
| LVESVi (ml/m <sup>2</sup> ) | 91 ± 38          | 88 ± 45       | 0.540   |
| LVSVi (ml/m <sup>2</sup> )  | 41 ± 12          | 41 ± 12       | 0.898   |
| LVEF (%)                    | 34 ± 14          | 35 ± 15       | 0.473   |
| LVMi (g/m <sup>2</sup> )    | 72 ± 20          | 73 ± 20       | 0.599   |
| GCS (%)                     | -8.9 ± 4.0       | -9.9 ± 4.7    | 0.102   |
| SSR <sub>C</sub> (1/s)      | -0.51 ± 0.22     | -0.54 ± 0.26  | 0.377   |
| DSR <sub>C</sub> (1/s)      | 0.50 ± 0.26      | 0.50 ± 0.19   | 0.923   |
| GLS (%)                     | -8.5 ± 3.4       | -9.7 ± 4.5    | 0.058   |
| SSR <sub>L</sub> (1/s)      | -0.48 ± 0.20     | -0.52 ± 0.21  | 0.291   |
| DSR <sub>L</sub> (1/s)      | 0.47 ± 0.19      | 0.48 ± 0.16   | 0.751   |
| GRS (%)                     | 12.4 ± 6.9       | 14.4 ± 8.7    | 0.085   |
| SSR <sub>R</sub> (1/s)      | 0.67 ± 0.34      | 0.77 ± 0.36   | 0.096   |
| DSR <sub>R</sub> (1/s)      | -0.65 ± 0.44     | -0.7 ± 0.39   | 0.45    |
| Basal systolic rotation     |                  |               |         |
| Net Clockwise (°)           | -1.6 ± 1.1       | -1.1 ± 1.2    | 0.032*  |
| Magnitude (°)               | -1.4 ± 1.4       | -0.7 ± 1.7    | 0.008*  |
| Apical systolic rotation    |                  |               |         |
| Net Counterclockwise (°)    | 1.9 ± 1.7        | 2.6 ± 2.2     | 0.033*  |
| Magnitude (°)               | 1.1 ± 2.7        | 1.9 ± 3.2     | 0.141   |

|                             |             |             |       |
|-----------------------------|-------------|-------------|-------|
| Twist (°)                   | 2.6 ± 2.4   | 2.6 ± 3.4   | 0.954 |
| Twist per length (°/cm)     | 0.38 ± 0.37 | 0.38 ± 0.51 | 0.951 |
| Torsion (°s <sup>-1</sup> ) | 1.23 ± 1.00 | 1.17 ± 1.52 | 0.714 |

---

DSRc= circumferential diastolic strain rate; DSRL= longitudinal diastolic strain rate; DSRR= radial diastolic strain rate; GCS= global circumferential strain; GLS= global longitudinal strain; GRS= global radial strain; LGE= late-gadolinium enhancement; LVEDVi= left ventricular end-diastolic volume index; LVESVi= left ventricular end-systolic volume index; LVEF=left ventricular ejection fraction; LVMi= left ventricular mass index; LVSVi= left ventricular stroke volume index; SSRC= circumferential systolic strain rate; SSRL= longitudinal systolic strain rate; SSRR= radial systolic strain rate; \*Significant value (P < 0.05)

**Table S3. Cardiac magnetic resonance left ventricular mechanical parameters in non-ischemic cardiomyopathy patients with and without left bundle branch block (LBBB).**

|                                 | <b>LBBB+</b>  | <b>LBBB-</b>   |                |
|---------------------------------|---------------|----------------|----------------|
| <b>Variables</b>                | <b>N = 56</b> | <b>N = 183</b> | <b>P value</b> |
| <b>Basal systolic rotation</b>  |               |                |                |
| Net Clockwise (°)               | -2.2 ± 1.2    | -1.3 ± 1.1     | 0.040*         |
| Magnitude (°)                   | -2.0 ± 1.4    | -1.0 ± 1.5     | 0.001*         |
| <b>Apical systolic rotation</b> |               |                |                |
| Net Counterclockwise (°)        | 0.8 ± 1.1     | 2.4 ± 1.8      | 0.001*         |
| Magnitude (°)                   | -0.9 ± 2.7    | 2.0 ± 2.5      | 0.001*         |
| Twist (°)                       | 1.3 ± 2.1     | 3.3 ± 2.6      | 0.001*         |
| Torsion (°s <sup>-1</sup> )     | 1.0 ± 0.8     | 1.5 ± 1.1      | 0.002*         |
